# Supplementary material for: Vitamin B2 enables regulation of fasting glucose availability
Source: eLife journal article supplement (doi:10.7554/elife.84077), 2023-06-26
Supplement: fig1-data1 [file Figure_1_source data.xlsx]

## Sheet: Figure 1
Figure 1- Numerical data presented in Figure 1
Figure 1a	Ad libitum FAD (pmol/mg tissue)
Brain	Liver	Heart	Kidney	Lungs	eWAT	iWAT	SKM
0.102993	0.886188	1.08245	1.08982	0.253557	0.065041	0.082889	0.125691
0.132743	0.935711	1.00541	1.14979	0.309456	0.121812	0.103599	0.149635
0.15667	1.05878	1.18571	0.852949	0.325598	0.040015	0.058298	0.179642
Figure 1c	Fasting Liver FAD (pmol/mg tissue)
Ctrl	B2D
0.367929	0.202204
0.340326	0.107163
0.23683	0.131515
0.385354	0.0760606
0.433333	0.146717
Figure 1d	Weekly Body Weight on Diet (g)
Week of Diet	Ctrl					B2D
0	18.04	17.14	17.28	15.62	18.48	18.22	16.74	17.54	15.43	18.6
1	20.95	19.56	19.08	18.39	20.95	21.28	19.28	20.61	19.31	21.72
2	22.57	21.2	20.23	18.98	22.15	21.63	19.28	21.36	19.38	21.75
3	23.64	22.46	21.47	20.25	23.38	21.34	19.66	21.25	19.54	21.7
4	24.38	23.47	22.09	20.96	23.41	21.16	20.02	21.76	19.53	21.93
Figure 1e	Weekly Body Weight on Diet (% of Body Weight at Diet Start)
Week of Diet	Ctrl					B2D
0	100	100	100	100	100	100	100	100	100	100
1	116.1	114.1	110.4	117.7	113.4	116.8	115.2	117.5	125.1	116.8
2	125.1	123.7	117.1	121.5	119.9	118.7	115.2	121.8	125.6	116.9
3	131	131	124.2	129.6	126.5	117.1	117.4	121.2	126.6	116.7
4	135.1	136.9	127.8	134.2	126.7	116.1	119.6	124.1	126.6	117.9
Figure 1f	Body Composition (% of Body Weight)
	Ctrl					B2D
Lean	81.3372	85.556	87.1435	84.1126	82.4755	89.603	87.9121	87.3162	88.6841	88.6001
Fat	11.813	8.4363	5.79448	7.96756	10.7614	3.44991	4.995	5.51471	3.53303	4.01277
Figure 1g	Oxygen Consumption over 48 Hours (ml/hr)
Hour	Ctrl					B2D						Figure 1h	RER
0	202.151	161.724	153.165	182.254	155.354	131.837	106.546	134.934	128.781	137.421			Ctrl					B2D
1	198.128	213.295	136.185	189.436	180.102	128.737	130.811	141.788	115.084	130.805		Day	0.913404	0.909388	0.887752	0.877234	0.876563	0.8686	0.902507	0.902053	0.874692	0.867908
2	229.038	185.069	144.181	155.977	140.174	166.931	103.577	123.241	121.916	113.148		Night	0.968421	0.940959	0.954067	0.984526	0.944944	0.992352	0.964133	0.961214	0.977315	0.992515
3	188.815	163.555	187.316	163.39	168.292	140.915	128.939	147.565	120.389	130.922
4	228.278	189.614	167.464	221.138	159.939	153.057	121.074	138.836	160.875	141.273
5	208.169	209.341	161.588	196.8	181.944	146.455	133.907	151.834	150.661	126.682
6	218.12	275.499	151.236	190.946	184.256	179.423	146.019	182.088	146.534	117.501
7	192.87	205.816	153.047	184.567	156.788	149.464	127.597	136.689	185.75	130.22
8	226.255	188.12	183.181	219.21	193.252	134.507	147.294	174.718	140.505	114.321		Figure 1i	Locomotor Activity (counts)
9	186.044	223.998	137.871	177.678	149.845	168.984	126.446	157.586	175.946	109.782			Ctrl					B2D
10	185.507	214.164	174.334	175.386	188.958	139.762	114.695	148.74	202.126	106.755		Day	997.611	2532.16	2299.25	1078.72	1949.44	750.443	1219.2	1568.32	1417.07	1484.38
11	190.895	201.756	140.537	176.909	155.707	211.05	162.909	141.846	175.086	155.235		Night	3622.86	6899.64	5126.85	6209.8	5063.07	2419.77	2465.31	3289.19	4140.58	3036.84
12	214.65	198.474	169.596	193.964	205.352	215.042	138.398	200.881	180.919	156.185
13	208.681	190.561	224.361	239.915	186.826	159.546	171.631	193.454	190.095	175.988		Figure 1j	Total Food Intake (kcal)
14	256.843	200.285	205.503	211.228	198.652	229.893	173.403	168.76	258.519	174.841		Ctrl	B2D
15	280.386	280.263	204.804	234.972	205.924	237.387	156.303	203.616	229.334	181.405		26.4739	22.6284
16	273.897	269.67	243.896	291.197	234.238	227.794	178.805	189.965	235.258	208.116		26.4347	24.682
17	312.17	272.659	260.588	304.409	261.212	255.063	202.402	215.468	275.09	215.89		20.4048	28.1612
18	305.953	306.19	269.115	287.404	268.014	270.89	206.837	210.194	286.154	226.237		22.0921	19.2014
19	315.875	318.879	270.492	270.751	273.363	262.165	178.565	196.515	255.797	208.869		16.7947	7.49484
20	304.153	307.715	225.252	245.484	263.218	213.074	157.264	159.058	224.862	205.024
21	246.352	281.233	172.597	210.893	210.869	186.159	149.629	186.157	208.903	189.431
22	219.802	221.518	171.404	215.986	171.588	165.492	145.098	172.035	190.769	173.145
23	252.463	276.559	206.619	197.401	188.354	154.602	128.095	160.944	210.449	168.971
24	223.138	228.199	230.517	224.51	194.898	143.422	136.797	145.212	181.336	135.571
25	201.159	225.515	190.917	191.295	156.373	172.221	116.747	190.607	167.971	156.741
26	210.692	196.428	177.905	183.578	192.676	148.014	127.728	156.52	158.89	156.361
27	213.24	194.684	151.062	202.404	161.835	144.191	111.992	135.55	152.796	150.264
28	208.425	188.683	170.675	188.263	199.043	176.016	124.117	169.26	149.209	137.446
29	241.98	254.016	150.05	184.658	167.211	152.109	135.796	159.624	202.533	124.409
30	213.91	203.086	156.861	205.418	196.191	140.904	130.283	133.643	162.359	160.791
31	206.791	198.603	152.281	192.119	168.23	195.398	116.149	185.678	141.378	141.492
32	224.507	195.935	174.526	192.49	167.234	148.684	147.417	174.004	167.792	128.861
33	206.141	180.625	146.17	184.343	153.273	139.593	125.826	160.756	139.405	173.357
34	201.436	182.89	157.314	210.91	204.874	138.506	137.077	169.721	161.253	146.858
35	223.869	258.131	157.752	193.684	176.372	221.785	141.208	139.59	142.305	212.535
36	218.607	231.923	196.24	176.274	211.911	232.062	161.351	192.532	176.961	201.515
37	210.448	189.669	217.344	234.7	246.126	185.439	173.393	184.322	245.544	221.997
38	221.797	248.852	173.848	231.992	204.419	210.034	154.594	194.172	178.745	216.581
39	249.123	242.789	248.284	250.018	228.76	201.457	172.679	214.26	232.583	195.089
40	291.162	255.103	269.122	301.489	266.619	221.376	155.245	189.123	233.598	213.174
41	311.747	322.83	287.126	308.626	265.816	235.299	188.902	231.875	273.492	227.611
42	332.763	351.909	276.596	305.813	273.029	251.607	198.852	229.445	291.322	200.857
43	337.346	380.331	270.61	292.86	260.389	228.704	166.767	196.047	296.856	210.513
44	334.884	388.123	250.788	244.044	229.234	192.926	168.048	208.011	272.834	192.268
45	296.095	375.966	206.166	218.518	185.376	176.496	145.839	179.643	217.701	159.438
46	224.991	300.158	174.378	226.613	191.857	168.525	112.826	165.76	179.178	210.506
47	242.524	209.767	182.714	195.061	178.253	143.856	155.335	157.107	162.757	177.45
48	227.27	180.578	161.021	225.582	161.173	148.776	123.71	180.354	156.286	148.196
