# Supplementary material for: Vitamin B2 enables regulation of fasting glucose availability
Source: eLife journal article supplement (doi:10.7554/elife.84077), 2023-06-26
Supplement: fig1-figsupp2-data1 [file elife-84077-fig1-figsupp2-data1-v1.zip]

## Sheet: Figure S2
Supplemental Figure S1, Related to Figure 1 - Numerical data presented in Figure S2
Figure S2a	Fasting Liver FAD (pmol/mg tissue)
Ctrl	B2D
0.367929	0.202204
0.340326	0.107163
0.23683	0.131515
0.385354	0.0760606
0.433333	0.146717
Figure S2b	Weekly Body Weight on Diet (g)
Week of Diet	Ctrl					B2D
0	15.71	16.49	14.62	16.83	13.92	16.8	16.49	13.34	17.3	13.9
1	17.42	17.97	17.13	19.01	16.89	17.68	17.45	16.53	17.42	17.03
2	17.21	17.76	18.18	18.48	17.25	18.15	18.42	16.98	18.26	17.48
3	18.4	18.75	18.2	19.55	18.14	18.41	18.69	16.29	18.25	16.94
4	19.22	18.42	18.8	20.88	18.14	18.1	18.1	16.55	18.65	16.65
Figure S2c	Weekly Body Weight on Diet (% of Body Weight at Diet Start)
Week of Diet	Ctrl					B2D
0	100	100	100	100	100	100	100	100	100	100
1	110.885	108.975	117.168	112.953	121.336	105.238	105.822	123.913	100.694	122.518
2	109.548	107.702	124.35	109.804	123.922	108.036	111.704	127.286	105.549	125.755
3	117.123	113.705	124.487	116.162	130.316	109.583	113.341	122.114	105.491	121.871
4	122.343	111.704	128.591	124.064	130.316	107.738	109.763	124.063	107.803	119.784
Figure S2d	Body Composition (% of Body Weight)
	Ctrl					B2D
Lean	83.8555	85.5104	83.9286	79.4554	83.5307	80.2118	86.1547	83.323	85.2877	83.2518
Fat	10.3027	9.76948	9.84849	14.8515	8.51664	8.58417	6.10987	9.17545	7.00326	7.33496
Figure S2e	Oxygen Consumption over 48 Hours (ml/hr)
Hour	Ctrl					B2D						Figure S2f	RER
0	154.073	238.682	167.521	104.01	114.896	116.718	130.839	106.764	176.101	103.673			Ctrl					B2D
1	135.717	195.027	129.951	92.3948	113.147	152.107	137.511	113.862	135.154	91.0107		Day	0.884396	0.900039	0.869901	0.882085	0.948201	0.869451	0.8675	0.885093	0.889632	0.888203
2	123.701	156.461	128.633	86.254	107.639	123.948	125.79	90.3764	125.219	105.806		Night	0.968828	0.907518	0.950988	0.946872	0.992755	0.959706	0.955091	0.959018	0.950915	0.964834
3	122.564	170.43	143.928	86.2439	149.969	119.086	140.936	106.942	141.662	93.0993
4	130.727	170.585	129.111	85.6009	118.064	126.973	141.037	115.071	144.173	91.9487
5	138.777	185.595	127.081	96.2395	120.523	123.977	155.119	99.0382	138.62	85.2029
6	121.466	184.32	163.881	85.2844	128.483	129.545	127.601	137.911	189.216	105.042
7	139.731	168.802	146.334	82.0625	154.721	129.676	116.454	102.603	145.469	90.2963
8	119.467	173.354	117.41	85.2036	118.082	127.147	165.448	128.82	139.832	98.1382		Figure S2g	Locomotor Activity (counts)
9	127.686	156.048	130.598	89.9843	126.575	126.292	138.153	106.281	173.213	85.8655			Ctrl					B2D
10	119.96	192.069	127.493	86.1193	112.843	120.575	123.56	110.114	132.305	102.904		Day	691.279	1447.11	1261.06	947.595	1756.51	1651.45	1071.76	1132.13	1726.82	875.843
11	116.777	161.056	127.715	89.5769	117.207	147.562	149.214	97.5596	161.764	106.149		Night	9323.66	4108.32	6740.07	4883.17	7654.78	3331.98	2114.18	1858.36	4351.31	3985.32
12	146.723	200.371	131.695	104.609	129.169	117.405	144.445	144.826	137.444	92.3522
13	206.515	186.366	216.278	139.838	179.499	158.362	129.679	114.991	184.909	140.816		Figure S2h	Total Food Intake (kcal)
14	223.857	214.328	238.491	142.774	209.143	157.406	122.222	152.714	210.706	153.364		Ctrl	B2D
15	230.253	293.542	241.839	144.214	214.214	199.786	159.026	141.992	214.157	162.766		46.5386	37.9058
16	228.69	318.382	234.832	147.851	216.56	208.433	162.737	155.945	220.174	164.05		35.0806	59.4094
17	232.965	317.477	230.723	150.517	204.066	210.831	195.303	174.156	227.554	158.937		62.784	49.1285
18	235.469	317.417	240.933	154.086	194.294	211.405	216.048	154.144	235.893	134.065		36.4932	20.2086
19	226.883	296.922	237.992	154.267	150.167	173.055	220.841	113.001	227.53	104.813		31.8629	7.2594
20	210.124	270.968	239.599	155.473	145.38	143.58	204.024	101.958	211.462	139.076
21	198.562	238.318	233.803	156.685	175.562	123.454	177.151	116.878	156.275	134.141
22	185.124	254.251	223.525	155.984	148.447	123.648	139.723	108.549	151.83	127.008
23	162.588	209.755	205.491	132.364	150.203	104.787	125.338	140.627	130.051	99.3706
24	137.107	183.354	138.144	91.0683	125.522	117.818	118.377	110.765	140.287	96.0768
25	127.523	213.071	115.198	95.4349	126.06	120.279	158.538	98.7371	155.158	96.5186
26	131.245	194.325	120.785	83.5203	114.979	109.673	133.36	118.577	121.173	96.1586
27	136.505	169.501	127.29	90.799	149.494	131.034	121.936	94.9788	113.467	103.501
28	136.323	195.561	116.701	82.3352	118.389	101.074	110.804	109.12	169.347	92.8594
29	134.754	174.22	167.595	85.8197	141.822	103.526	131.189	106.017	129.621	117.743
30	123.035	175.814	143.614	76.7533	117.183	105.912	119.433	92.1453	160.764	94.6426
31	137.12	181.951	110.658	85.1026	115.718	128.732	110.685	138.968	151.072	89.0475
32	126.174	177.481	119.442	74.5043	145.218	124.853	150.168	134.6	138.758	103.199
33	128.245	184.778	103.636	86.9105	128.968	129.174	122.21	98.0811	124.955	91.6705
34	131.104	166.136	113.202	88.0585	116.882	159.576	107.153	100.748	162.876	84.1231
35	130.561	181.787	117.989	89.3715	129.778	120.575	174.77	94.0137	142.506	100.865
36	186.762	204.787	188.089	103.99	148.622	167.918	131.968	145.095	151.867	89.0202
37	228.351	188.386	232.294	142.296	210.821	182.779	176.675	107.829	215.766	148.854
38	238.689	226.165	254.833	150.281	224.243	167.482	135.828	122.765	220.414	155.322
39	243.516	312.382	259.133	144.592	223.504	192.021	130.937	135.282	216.76	158.098
40	242.888	343.769	267.119	150.258	223.194	210.119	167.631	135.761	220.033	152.612
41	244.037	343.921	258.548	103.862	225.993	201.663	183.139	167.693	228.776	134.801
42	235.745	342.342	252.843	118.399	221.956	185.876	222.09	148.444	234.496	114.193
43	216.972	320.733	248.753	137.697	211.803	179.875	202.484	104.829	235.432	111.39
44	202.372	314.523	246.163	123.442	198.044	155.043	195.776	88.9408	224.257	103.821
45	190.249	279.282	232.916	93.4452	195.06	135.782	177.246	90.4678	166.173	111.788
46	182.299	218.646	225.099	113.113	179.569	118.524	138.082	39.0588	195.261	113.042
47	143.271	210.119	185.73	141.39	169.153	106.321	130.72	71.5258	160.352	87.7169
48	143.758	181.198	130.838	115.477	160.137	131.411	149.713	90.9356	136.369	75.6268
