# Supplementary material for: Vitamin B2 enables regulation of fasting glucose availability
Source: eLife journal article supplement (doi:10.7554/elife.84077), 2023-06-26
Supplement: fig1-figsupp3-data1 [file elife-84077-fig1-figsupp3-data1-v1.zip]

## Sheet: Figure S3
Supplemental Figure S3, Related to Figure 1 - Numerical data presented in Figure S3
Figure S3a	Fasting Liver FAD (pmol/mg tissue)
90% Ctrl	90% B2D
0.411426	0.508628
0.465399	0.305757
0.395551	0.514588
0.529794	0.388028
0.564008	0.515565
Figure S3b
Week of Diet	Ctrl					B2D
0	17.36	17.13	16.77	16.33	17.92	13.14	16.02	17.33	20.06	17.15
1	18.18	18.16	17.95	17.77	19.1	15.75	17.77	19.04	20.28	18.14
2	19.34	19.87	19.32	19.22	21.02	17.79	19.19	20.53	22.46	18.44
3	20.51	21.23	20.51	20.26	22.05	18.75	19.81	21.53	23.02	19.28
4	21.1	21.78	21.05	21.15	22.75	19.63	21.15	22.27	23.53	19.84
Figure S3c	Weekly Body Weight on Diet (% of Body Weight at Diet Start)
Week of Diet	90% Ctrl					90% B2D
0	100	100	100	100	100	100	100	100	100	100
1	104.7	106	107	108.8	106.6	119.9	110.9	109.9	101.1	105.8
2	111.4	116	115.2	117.7	117.3	135.4	119.8	118.5	112	107.5
3	118.1	123.9	122.3	124.1	123	142.7	123.7	124.2	114.8	112.4
4	121.5	127.1	125.5	129.5	127	149.4	132	128.5	117.3	115.7
Figure S3d	Body Composition (% of Body Weight)
	90% Ctrl					90% B2D
Lean	82.319	82.6724	81.7817	84.7043	79.2648	84.1395	84.4417	77.0204	79.6393	88.7604
Fat	9.90671	11.0345	11.8931	9.15963	14.1677	9.90698	11.376	16	13.6673	5.41166
Figure S3e	Pyruvate Tolerance Test (mg/dl)
Minutes	90% Ctrl					90% B2D
0	128	198	209	185	131	78	129	133	121	94
15	120	184	231	289	249	110	139	148	157	100
30	101	162	216	218	126	92	163	180	162	101
60	111	158	172	159	115	69	115	127	101	67
120	104	184	214	192	180	113	199	185	170	120
Figure S3e	PTT AUC
90% Ctrl	90% B2D
13148	10800
20520	17865
24053	18533
23543	16553
18128	11093
Figure S3f	Oxygen Consumption over 48 Hours (ml/hr)
Hours	90% Ctrl					90% B2D
0	113.529	117.825	98.8848	124.4	95.3067	103.236	95.1459	118.751	95.5585	72.9567
1	126.266	115.706	80.9996	131.034	96.7028	127.516	105.527	130.536	86.984	86.1341
2	105.009	107.903	99.7903	104.14	91.998	105.644	107.197	88.2082	84.514	91.5103
3	100.158	103.843	117.335	111.176	128.361	104.741	97.9035	106.281	114.171	73.6593
4	93.1989	116.139	84.5242	100.38	97.6389	93.9048	97.9274	84.0105	93.5875	67.249
5	118.838	111.275	84.5841	113.462	93.846	91.4718	122.324	91.3278	87.6327	86.3935
6	94.3244	99.1336	79.7199	118.466	91.0054	100.204	111.134	99.0943	99.6669	67.8652
7	89.3309	105.108	91.7382	101.07	92.7889	92.0343	101.849	98.4247	89.7784	73.0864
8	96.5079	103.573	82.6983	111.633	95.7021	94.6717	108.145	92.12	88.7472	67.7499
9	91.7132	103.426	90.6681	113.762	117.927	85.7957	97.505	89.5965	85.0546	66.3085
10	97.5358	100.676	87.2295	94.0982	102.376	97.5885	108.918	90.6663	107.959	87.4889
11	126.427	99.4275	105.927	121.431	95.4278	104.469	99.5453	132.749	92.5645	65.7032
12	116.437	119.944	111.547	114.886	143.549	103.049	126.018	97.1303	93.9451	100.728
13	142.961	113.487	142.954	119.298	114.574	124.162	109.117	138.27	141.333	79.785
14	149.163	144.617	153.771	150.473	137.037	136.439	129.648	146.771	138.606	107.768
15	149.234	149.918	157.352	153.562	153.911	128.405	133.888	157.462	145.296	112.132
16	122.424	148.766	155.339	156.028	146.454	150.038	138.893	155.796	137.907	115.054
17	141.678	129.889	148.327	162.232	116.765	149.232	139.228	150.161	104.274	110.968
18	101.284	134.699	129.783	153.974	114.392	144.86	132.613	145.889	126.372	79.3454
19	133.829	129.572	107.296	144.633	129.265	132.132	133.585	118.862	103.056	111.026
20	123.28	127.592	125.024	128.493	103.207	108.317	113.851	96.383	122.929	90.2923
21	125.883	121.649	86.2305	150.84	144.542	132.92	136.574	121.838	98.7188	93.3335
22	107.665	123.316	79.473	125.404	115.143	105.006	121.527	94.9375	137.425	73.1513
23	95.0972	128.404	110.357	132.511	108.307	105.898	106.854	116.718	100.923	96.209
24	132.456	114.623	79.4056	117.555	87.9549	106.332	96.9232	85.8725	83.4827	70.2362
25	95.69	116.325	75.8698	119.437	90.0854	119.21	110.592	105.963	93.7621	70.51
26	96.5154	111.051	104.243	117.338	119.194	95.8398	98.7961	87.3303	96.9183	79.3238
27	110.832	112.01	82.9976	141.155	91.1184	99.6525	112.365	102.778	95.3256	70.3731
28	95.6375	108.661	109.433	112.967	92.9059	101.659	101.538	93.149	87.2751	70.4091
29	91.1768	99.5512	82.5861	121.626	109.518	94.4567	108.153	88.9922	79.9481	100.955
30	100.515	106.14	99.4535	109.526	89.9321	99.932	99.1667	86.9873	105.813	75.1223
31	90.7228	95.0891	87.106	103.566	83.9361	89.8808	110.01	96.5545	86.7428	66.9932
32	94.497	99.2612	92.5501	122.087	92.9018	97.352	95.911	96.2278	82.1437	80.83
33	122.331	108.8	90.7055	104.114	98.3007	100.57	105.443	112.921	85.6284	66.1896
34	87.1662	104.091	83.9106	124.115	106.008	120.68	119.622	88.2122	106.062	74.7115
35	134.34	114.461	116.553	104.871	93.6806	101.322	108.583	119.944	84.1813	76.4555
36	115.544	128.76	139.01	123.23	148.012	102.877	109.133	130.667	106.761	104.216
37	156.497	121.653	115.603	117.12	140.313	104.906	123.686	124.46	142.053	82.2533
38	158.973	146.121	151.44	136.222	150.417	144.695	111.528	145.759	148.627	98.3422
39	161.119	160.08	160.461	154.934	155.477	134.848	145.508	150.601	143.77	117.476
40	127.688	157.702	156.828	160.863	154.072	147.547	146.218	143.938	141.442	123.31
41	128.442	156.36	147.96	162.408	152.838	138.847	133.227	135.865	113.597	121.079
42	110.967	127.94	133.922	160.249	143.045	110.209	141.826	105.538	122.005	113.707
43	130.445	118.39	114.147	155.125	113.843	120.221	147.062	128.568	119.535	82.0911
44	116.624	140.283	122.495	134.243	129.023	136.181	136.988	130.65	91.5041	117.926
45	102.21	129.789	91.1096	131.881	113.319	117.046	111.361	99.078	127.611	77.7239
46	109.504	115.381	104.482	120.209	110.41	94.5642	124.475	90.8705	102.553	103.877
47	91.0304	123.981	83.413	110.441	92.579	105.235	121.168	96.1298	114.995	70.3803
48	110.719	122.55	104.737	139.475	122.067	100.297	114.696	88.9105	81.6613	72.2324
Figure S3g	RER
	Ctrl					B2D
Day	0.846975	0.84758	0.841292	0.865088	0.861126	0.879148	0.872574	0.866281	0.868943	0.867925
Night	0.936497	0.940815	0.910399	0.900439	0.90843	0.921767	0.927595	0.891537	0.955897	0.955695
Figure S3h	Locomotor Activity (counts)
	90% Ctrl					90% B2D
Day	1874.95	1186.05	1741.56	1453.57	619.708	622.818	342.015	1873.82	508	1726.38
Night	3650.58	3874.85	5397.49	5049.42	4404.06	2388.51	2179.65	5219.06	4111.47	6430.12
Figure S3i	Food Intake (g)
90% Ctrl	90% B2D
20.2	20.08
24	25.44
15.24	17.96
20.68	20.92
16.96	19.68
