# Supplementary material for: Vitamin B2 enables regulation of fasting glucose availability
Source: eLife journal article supplement (doi:10.7554/elife.84077), 2023-06-26
Supplement: fig2-data1 [file Figure_2_source data.xlsx]

## Sheet: Figure 2
Figure 2- Numerical data presented in Figure 2
Figure 2a	FAD vs Glucose (Relative Levels)
ZT	FAD			Glucose
0	1.06	1.139	0.982	0.951			0.999	0.903
4	1.023	1.121	0.926	1.087			1.14	1.033
8	1.25	1.317	1.182	1.038			1.106	0.97
12	1.353	1.466	1.24	0.743			0.822	0.665
16	1.263	1.404	1.123	0.992			1.056	0.928
20	1.148	1.227	1.069	1.028			1.053	1.002
24	0.95	1.018	0.882	1.01			1.092	0.928
Figure 2b	Fast/Re-Fed Blood Glucose (mg/dl)
Ctrl	B2D
94	121
69	159
73	146
76	222
Figure 2c	Fast/Re-Fed FAD (pmol/mg tissue)
Ctrl	B2D
1.03708	0.639586
1.19002	0.640074
0.897525	0.663554
0.875368	0.719713
Figure 2d	Pyruvate Tolerance Test (mg/dl)
Minutes	Ctrl					B2D
0	128	120	101	111	104	78	110	92	69	113
15	198	184	162	158	184	129	139	163	115	199
30	209	231	216	172	214	133	148	180	127	185
60	185	289	218	159	192	121	157	162	101	170
120	131	249	126	115	180	94	100	101	67	120
Figure 2e'	Hepatic Glucose Production (mg/kg/min)
Minutes	Ctrl							B2D
60	12.0496	6.86597	10.0509	14.1325	11.6263	17.2329	13.4658	7.7104	6.25504	8.42531	6.18823	6.3436
90	11.6585		9.54255	15.7192	10.4602	16.8905	14.4939	6.02118	5.39322	6.65602	5.42781	5.30274
120	10.5421		8.37355	13.0631	11.2425	16.9548	14.6386	7.72522	5.33466	7.11747	5.29197	5.55227
Figure 2e"	Hepatic Glucose Production (mg/kg/min)
Ctrl	B2D
14.1995	7.15226
11.1097	5.73287
11.4167	5.636
17.026	7.3996
14.3049	5.66097
6.86597
9.32234
Figure 2h	Lipidomics
	Up	Down
TG	60	38
DG	2	36
PC	5	33
PE	0	27
L-PC	0	5
