# Supplementary material for: Vitamin B2 enables regulation of fasting glucose availability
Source: eLife journal article supplement (doi:10.7554/elife.84077), 2023-06-26
Supplement: fig3-data1 [file Figure_3_source data.xlsx]

## Sheet: Figure 3
Figure 3- Numerical data presented in Figure 3
Figure 3d	Weekly Body Weight on Diet (g)
Week of Diet	Ctrl GFP				Ctrl Cre					B2D GFP					B2D Cre
0	26.59	24.32	29.96	26.44	25.33	26.54	25.74	21.8	23.86	26.73	28.5	20.75	24.34	23.59	27.3	27.53	26.18	25.41	24.9
1	27.82	25.03	28.8	26.75	26.46	27.03	26.33	22.2	23.92	26.79	28.74	21.82	26.26	25.66	27.11	27.32	26.47	25.18	24.68
2	26.77	24.5	28.4	27.18	25.67	26.87	25.28	22.67	24.5	26.99	28.01	22.87	26.71	25.74	26.65	26.81	27.45	25.35	24.76
3	28.87	26.65	31.01	30.46	28.79	28.3	28.66	23.34	25.53	27.12	30.07	23.05	26.89	25.97	26.91	26.41	27.44	25.72	25.83
4	29.45	27.28	32.31	30.18	28.25	28.55	29.61	23.75	26.12	27.32	29.48	23.65	26.53	26.15	27.31	27.16	26.87	25.56	25.73
Figure 3e	Weekly Body Weight on Diet (% of Body Weight at Diet Start)
Week of Diet	Ctrl GFP				Ctrl Cre					B2D GFP					B2D Cre
0	100	100	100	100	100	100	100	100	100	100	100	100	100	100	100	100	100	100	100
1	104.626	102.919	96.1282	101.172	104.461	101.846	102.292	101.835	100.251	100.224	100.842	105.157	107.888	108.775	99.304	99.2372	101.108	99.0948	99.1165
2	100.677	100.74	94.7931	102.799	101.342	101.243	98.2129	103.991	102.682	100.973	98.2807	110.217	109.737	109.114	97.619	97.3847	104.851	99.7639	99.4378
3	108.575	109.581	103.505	115.204	113.66	106.631	111.344	107.064	106.999	101.459	105.509	111.084	110.477	110.089	98.5714	95.9317	104.813	101.22	103.735
4	110.756	112.171	107.844	114.145	111.528	107.573	115.035	108.945	109.472	102.207	103.439	113.976	108.998	110.852	100.037	98.656	102.636	100.59	103.333
Figure 3f	Body compostion (% of Body Weight
	Ctrl GFP				Ctrl Cre					B2D GFP					B2D Cre
Lean	76.5753	75.4579	68.1875	77.1287	70.4688	74.9355	72.8526	79.572	74.4364	79.9634	76.8919	82.0346	81.9615	89.3976	85.055	80.5797	84.6183	86.0163	81.579
Fat	17.6027	15.7143	26.25	16.7327	21.9688	18.3871	19.9679	12.9183	17.3454	13.9194	16.1824	10.1299	10.6923	4.13655	9.30403	11.9203	9.0458	7.03252	11.7409
Figure 3g	Pyruvate Tolerance Test (mg/dl)
Minutes	Ctrl GFP				Ctrl Cre					B2D GFP					B2D Cre
0	144	153	131	126	206	187	146	138	128	140	132	139	129	143	138	141	117	100	139
15	237	269	226	231	241	219	178	224	204	195	197	175	187	180	219	202	159	139	163
30	334	400	260	286	208	265	207	240	248	254	226	193	242	231	208	233	174	145	196
60	224	274	226	233	218	233	156	222	215	174	195	176	195	199	213	217	197	103	184
120	158	181	137	183	170	166	150	159	169	159	141	122	167	162	172	149	143	86	149
Figure 3h	Pyruvate Tolerance Test AUC
Ctrl GFP	Ctrl Cre	B2D GFP	B2D Cre
26970	24750	22290	23745
31943	26115	22035	23565
24503	19943	19590	20333
26820	24555	23003	13313
	24345	22785	20648
Figure 3j	Fasting Liver FAD
Ctrl GFP	Ctrl Cre	B2D GFP	B2D Cre
1.01459	0.633908	0.681269	0.616311
1.06409	0.761782	0.63869	0.514312
0.991206	0.616273	0.768573	0.49967
0.930119	0.649547	0.666959	0.482652
	0.588128	0.384353	0.463872
Figure 3k	Liver Ppara mRNA
Ctrl GFP	Ctrl Cre	B2D GFP	B2D Cre
7.48881	2.85338	6.92752	4.39582
12.086	5.45178	10.3238	3.41706
9.8572	6.46605	8.68765	4.14731
11.1001	3.89308	6.97469	6.60095
	4.85499	9.4187	3.65056
Figure 3k	Acox1 Ppara mRNA
Ctrl GFP	Ctrl Cre	B2D GFP	B2D Cre
66.7336	22.6226	62.1251	53.7159
118.12	41.888	110.275	23.0104
185.971	59.7062	48.618	32.8667
129.076	31.0279	48.0473	29.7619
	38.5807	60.239	28.8011
Figure 3l	PPRE-luciferase +/-WY14643 +/- lumiflavin
lumiflavin (uM)	vehicle				WY14643
0	84475.6	70939.3	74372.6	79304.6	167388	154432	142786	179524
50	85250.9	77706.7	56902.6	52574.2	110132	142370	168044	183776
250	50128.1	52164.6	64585.7	42783.3	104618	96234.3	123069	126733
1000	14959.4	5533.91	8202.68	10485.9	13703.1	13115.7	18610.8	21665.3
