# Supplementary material for: Vitamin B2 enables regulation of fasting glucose availability
Source: eLife journal article supplement (doi:10.7554/elife.84077), 2023-06-26
Supplement: fig4-data1 [file Figure_4_source data.xlsx]

## Sheet: Figure 4
Figure 4- Numerical data presented in Figure 4
Figure 4c	Weekly Body Weight on Diet (g)
Week of Diet	Ctrl															B2D
0	18.36	17.68	15.26	17.59	12.66	13.98	16.83	17.77	16.24	16.53	16.71	15.06	17.87	17.46	17.21	17.95	18.3	17.01	15.91	15.14
1	20.39	20.25	17.49	19.91	15.91	18.34	21.34	21.46	20.87	20.68	19.58	18.56	21.03	19.73	20.3	21.81	21.79	20.9	20.45	19.4
2	22.23	23.46	18.84	22.76	18.66	20.09	22.82	23.42	21.69	21.75	20.44	18.31	21.91	20.04	21.31	22.6	22.67	21.64	20.96	19.92
3	23.65	24.44	20.28	23.52	20.57	21.9	24.38	25	23.44	23.45	20.84	19.48	22.02	20.66	22.18	22.99	23.05	21.89	21.43	19.75
4	25.19	27.39	21.02	25.07	22.62	23.01	25.54	25.8	24.04	24.15	20.9	19.57	22.29	21.08	22.38	23.36	23.14	21.83	21.82	20.25
5	26.48	28.51	22.74	26.48	24.29	23.89	27.37	26.55	25.33	25.85	20.59	19.93	22	21.03	22.4	23.72	22.98	22.28	21.76	20.4
6	27.02	29.72	22.72	27.53	24.32	24.03	27.81	27.82	26.62	26.3	21.52	19.17	22.67	20.99	23.08	24.53	23.21	23.23	22.02	20.6
7	27.92	29.45	23.1	27.64	24.38	24.52	28.74	28.41	26.6	26.03	21.78	19.95	22.51	21.22	23.12	23.52	22.69	22.85	21.34	20.25
8	27.95	29.19	22.76	28.07	24.32	24.67	28.8	27.39	26.46	25.46	21.22	20.49	22.82	21.55	23.76	21.22	20.04	20.13	20.54	18.27
9	27.62	28.98	23.7	28.6	24.78	25.53	29.26	27.31	27.06	25.82	21.66	20.89	22.44	21.82	23.84	21.13	20.52	18.98	19.9	19.66
Figure 4c	Weekly Body Weight on Diet (% of Body Weight at Diet Start)
Week of Diet	Ctrl															B2D
0	100	100	100	100	100	100	100	100	100	100	100	100	100	100	100	100	100	100	100	100
1	111.057	114.536	114.613	113.189	125.671	131.187	126.797	120.765	128.51	125.106	117.175	123.24	117.683	113.001	117.955	121.504	119.071	122.869	128.536	128.137
2	121.078	132.692	123.46	129.392	147.393	143.705	135.591	131.795	133.559	131.579	122.322	121.58	122.608	114.777	123.823	125.905	123.88	127.219	131.741	131.572
3	128.813	138.235	132.896	133.712	162.48	156.652	144.86	140.687	144.335	141.863	124.716	129.349	123.223	118.328	128.879	128.078	125.956	128.689	134.695	130.449
4	137.2	154.921	137.746	142.524	178.673	164.592	151.753	145.189	148.03	146.098	125.075	129.947	124.734	120.733	130.041	130.139	126.448	128.336	137.146	133.752
5	144.227	161.256	149.017	150.54	191.864	170.887	162.626	149.409	155.973	156.382	123.22	132.337	123.111	120.447	130.157	132.145	125.574	130.982	136.769	134.742
6	147.168	168.1	148.886	156.509	192.101	171.888	165.241	156.556	163.916	159.105	128.785	127.291	126.861	120.218	134.108	136.657	126.831	136.567	138.404	136.063
7	152.07	166.572	151.376	157.135	192.575	175.393	170.766	159.876	163.793	157.471	130.341	132.47	125.965	121.535	134.34	131.031	123.989	134.333	134.129	133.752
8	152.233	165.102	149.148	159.579	192.101	176.466	171.123	154.136	162.931	154.023	126.99	136.056	127.7	123.425	138.059	118.217	109.508	118.342	129.101	120.674
9	150.436	163.914	155.308	162.592	195.735	182.618	173.856	153.686	166.626	156.201	129.623	138.712	125.574	124.971	138.524	117.716	112.131	111.581	125.079	129.855
Figure 4d	Blood Glucose (mg/dl)
	Pre-Gavage					Post Gavage
Ctrl	84	81	85	114	102	262	234	238	196	200
B2D	79	71	82	89	69	170	161	103	145	124
