# Supplementary material for: Vitamin B2 enables regulation of fasting glucose availability
Source: eLife journal article supplement (doi:10.7554/elife.84077), 2023-06-26
Supplement: fig5-data1 [file Figure_5_source data.xlsx]

## Sheet: Figure 5
Figure 5- Numerical data presented in Figure 5
Figure 5a	Liver Ceramides Fraction Total
	Ctrl				B2D				Ctrl + FF				B2D + FF
Total Ceramide	1272.58	1037.52	915.969	3075.94	827.652	1253.98	1436.31	993.965	1155.98	1040.9	980.306	839.038	1404.46	1263.28	1037.65	1190.79
Dihydroceramide	0.0144019	0.0186169	0.0168616	0.00431063	0.0163193	0.0207375	0.0236331	0.0154265	0.0158545	0.0185565	0.0157549	0.0158029	0.0128038	0.017412	0.0247361	0.0131166
Deoxyceramides	0.00034319	0.0001681	0.00017506	0.00010751	0.00047595	0.00029108	0.00085629	0.00056216	0.00010868	0.00011971	0.00011297	0.00025022	0.00021558	0.0003081	0.00021717	0.00026038
Figure 5b	Liver NAD/NADH (Relative Abundance)
Ctrl	B2D	Ctrl + FF	B2D + FF
3.38804	0.889412	1.03815	0.354708
1.87203	1.61539	1.06169	0.171238
2.32486	1.67173	0.833152	0.40161
1.35267	0.635488	1.3393	0.202498
1.70462		0.65625	0.57979
Figure 5c	Liver FAD (Relative Abundance)
Ctrl	B2D	Ctrl + FF	B2D + FF
2.5479	2.0735	3.7632	1.5783
2.5094	1.3781	4.7581	1.0705
2.3712	0.9908	4.6007	1.2166
2.1998	1.7405	5.4223	1.2121
Figure 5c	Liver FMN (Relative Abundance)
Ctrl	B2D	Ctrl + FF	B2D + FF
137.67	152.49	273.48	180.84
184.82	103.97	299.73	143.31
213.29	83.02	323.27	113.1
194.94	122.22	365.56	108.26
Figure 5e	Liver Oxidized Ubiquinone / Total Ubiquinone
Ctrl	B2D	Ctrl + FF	B2D + FF
0.062392	0.138293	0.151446	0.293642
0.062037	0.111171	0.171875	0.295578
0.118934	0.149617	0.19879	0.199379
0.084635	0.199437	0.129899	0.229253
Figure 5e	Liver Reduced Ubiquinol / Total Ubiquinol
Ctrl	B2D	Ctrl + FF	B2D + FF
0.937608	0.861707	0.848554	0.706358
0.937963	0.888829	0.828125	0.704422
0.881066	0.850383	0.80121	0.800621
0.915365	0.800563	0.870101	0.770747
Figure 5e	Liver Total Ubiquinone + Ubiquinol (Relative Abundance)
Ctrl	B2D	Ctrl + FF	B2D + FF
910276051	906026464	740166086	888143987
800535028	678404740	854848537	812016012
633071414	688343214	816927240	701428237
621152535	600957680	1146488238	986931825
