# Supplementary material for: Vitamin B2 enables regulation of fasting glucose availability
Source: eLife journal article supplement (doi:10.7554/elife.84077), 2023-06-26
Supplement: fig5-figsupp1-data1 [file elife-84077-fig5-figsupp1-data1-v1.zip]

## Sheet: Figure S5
Supplemental Figure S5, Related to Figure 5 - Numerical data presented in Figure S5
Liver Ceramides and Sphingolipids (pmol/mg protein)
		Ctrl				B2D				Ctrl + FF				B2D + FF
Figure S5a	Sphingosine	31.433	18.516	17.935	12.529	19.733	27.84	29.646	19.599	18.026	18.545	15.416	15.864	28.732	18.206	18.831	20.709
Figure S5b	Sphingomyelin	16625.6	13516.1	9726.7	17327.6	12478.2	14411.1	13472	13670.4	9090.71	9047.58	7880.15	7676.13	11063.9	9787.38	7510.42	9027.83
Figure S5c	Sphinganine	2.736	1.894	2.274	0.748	1.486	3.75	3.104	1.667	1.258	1.391	1.312	1.517	2.557	1.914	2.011	1.428
Figure S5d	PC	54416.2	40721.5	31818.4	62584.8	31301.3	37217.8	38688.7	39352.2	126750	136480	116801	138315	130198	107450	83279.8	126705
Figure S5e	Hexosylceramides	1061.46	704.884	365.573	457.538	731.454	553.59	567.317	738.998	474.903	610.389	537.227	619.811	1089.61	1023.44	815.86	846.811
Figure S5f	Dihydroceramides	22.8118	16.2914	22.0722	8.73482	13.5067	26.0045	33.9445	15.3334	18.3276	19.3155	15.4447	13.2592	17.9825	21.9963	25.6673	15.619
Figure S5g	Phytoceramides	4.45542	3.66889	3.02304	3.77518	4.19962	5.06326	8.02933	5.30711	2.40972	2.28341	2.2339	2.37725	4.43592	4.98084	3.75195	3.93854
Figure S5h	Total DeoxyCer	0.436737	0.174406	0.16035	0.330697	0.393923	0.365004	1.2299	0.558765	0.125629	0.124602	0.110749	0.209941	0.302773	0.389217	0.225341	0.310052
