# Supplementary material for: Vitamin B2 enables regulation of fasting glucose availability
Source: eLife journal article supplement (doi:10.7554/elife.84077), 2023-06-26
Supplement: fig6-data1 [file Figure_6_source data.xlsx]

## Sheet: Figure 6
Figure 6- Numerical data presented in Figure 6
Figure 6a	Liver Metabolites (Z-Score)
	Ctrl					B2D							Ctrl + FF					B2D + FF
Lactate	-1.42416	-1.36186	-0.713322	-0.763786	0.919068	0.0178407	0.470995	0.565406	1.05343	1.23639		Lactate	-1.68855	0.34212	0.832525	0.0314906	0.719467	-1.04271	1.65496	-0.967846	-0.0990481	0.217598
G6P/F6P	2.10687	0.335811	-0.479598	-0.620209	0.81562	0.855368	-0.414819	-0.785098	-0.946533	-0.86741		G6P/F6P	1.93807	1.04343	0.149338	0.52347	0.0649517	-1.12572	0.16685	-0.975331	-0.979211	-0.805851
3PG/2PG	0.215848	0.947363	-0.197008	0.635918	1.96394	-1.05338	-1.18141	0.147544	-0.999295	-0.47952		3PG/2PG	0.471618	0.0222939	-0.651962	-0.419397	-0.219922	0.222283	-0.957504	0.756672	2.16109	-1.38517
FBP/GBP	0.622792	-0.35123	-1.05097	1.01893	1.83973	-0.454275	-0.125216	-1.05463	-1.09666	0.651519		FBP/GBP	0.693027	1.6866	0.254836	-0.875694	0.190427	-1.38462	-1.05737	1.2119	-0.508844	-0.210262
S-7-P	-1.65398	0.165068	0.884424	-1.58571	-0.0113366	0.839799	0.456266	1.0487	0.605441	-0.748674		S-7-P	0.70951	0.475139	-1.18179	-0.754989	-0.680846	0.43578	-0.633196	0.24933	-0.764458	2.14552
Ery-4-P	1.17785	0.700417	-0.295981	0.850055	1.47454	-0.764604	-0.59174	-0.0559076	-1.03737	-1.45725		Ery-4-P	1.48558	1.23075	-0.393524	-0.867873	-0.691577	-0.681375	-1.59878	0.48284	0.28903	0.744919
Ribo/Ribu/X-5P	-1.09814	-1.07808	-0.332632	-1.11874	2.01413	-0.00365916	0.43023	0.948789	-0.103691	0.341787		Ribo/Ribu/X-5P	0.494655	0.779	-0.600996	-0.602213	-0.233757	-0.0113215	-1.19242	0.807192	1.88301	-1.32315
Glu/Fru	-0.710279	-1.41817	-1.08228	-0.611906	1.43195	-0.444661	0.0838525	0.660535	1.22007	0.87089		Glu/Fru	0.0532215	0.822691	0.690926	0.583965	0.980883	-0.448894	1.15192	-1.52088	-1.26033	-1.05351
PEP	-1.11739	-0.184896	0.872817	-0.866252	1.87742	-1.05461	-0.741256	0.872057	-0.144908	0.487022		PEP	0.091573	-0.496419	-0.624648	-0.797062	-0.347946	0.217925	-0.00193405	0.771858	2.36128	-1.17462
Glycerol-3-P	-0.585264	-1.93935	-0.847269	-0.865085	0.985135	0.364618	0.411122	1.03232	0.879607	0.564164		Glycerol-3-P	-0.949129	-0.376568	-0.791857	-1.15287	-0.787321	0.52814	2.02816	0.324	0.279852	0.897585
Orotate	-1.80134	-0.694414	-0.519429	-0.397727	1.1525	-0.132699	1.74531	0.476523	0.410643	-0.239374		Orotate	-0.954088	-0.772374	-0.338208	-0.912124	-0.546526	1.06223	2.1893	-0.304523	0.103836	0.472482
2-HG	-1.06153	-1.26205	-0.686528	-0.978295	-0.541266	0.841027	0.555903	1.44305	0.972847	0.716842		2-HG	-0.774628	-0.765178	-0.493703	-1.23503	-1.0548	0.331473	0.76113	0.70155	0.738733	1.79045
Malate	-1.86103	-0.171567	-0.86959	-0.928564	-0.173033	0.547567	1.35702	0.500551	1.10675	0.491894		Malate	-0.909314	-0.630105	-0.25224	-1.72339	-0.6868	0.23911	1.45076	0.810609	0.897708	0.803659
OAA	-1.10454	-0.897393	1.3008	-1.66582	-0.240777	0.444358	0.354011	0.712362	1.26186	-0.16486		OAA	-0.560497	-0.690578	-0.9234	-1.11543	-0.902508	0.119619	1.50361	1.06239	0.137548	1.36925
Fumarate	-1.99499	-0.129443	-0.730177	-0.764803	-0.342308	0.257365	1.20929	0.533904	1.10555	0.855614		Fumarate	-0.714445	-0.543582	-0.158126	-1.69897	-0.950718	0.0144681	1.45238	0.942163	0.89503	0.761798
a-KG	-1.17508	-1.04794	0.314701	-1.2992	-0.485317	0.035111	0.258315	1.39367	1.49111	0.514627		a-KG	2.00696	0.247442	-0.683275	0.114442	-1.87969	-0.625174	0.167985	-0.102802	0.680137	0.0739709
Succinate	0.470317	-0.606111	0.020115	-0.117792	1.87328	0.385077	-1.17299	0.00620492	0.794789	-1.65289		Succinate	-0.413013	0.688382	1.01565	0.876152	0.431382	0.0361209	1.07796	-1.22575	-1.79671	-0.690172
Citrate	-1.19897	0.989176	-0.437636	-0.431194	-0.814085	-0.236416	1.93202	-0.921165	0.934257	0.184012		Citrate	0.0341892	0.0886116	1.26618	1.597	0.272146	-1.47711	0.349675	-0.326393	-1.50417	-0.30013
Aconitate	-1.91362	0.777109	-0.517413	-0.420963	-0.130269	-0.704322	1.41862	-0.189652	1.23756	0.442946		Aconitate	0.599739	0.195869	1.24389	1.65099	-0.232965	-1.6902	-0.0257224	-0.219664	-1.08563	-0.43631
Alanine	-1.60606	1.37012	0.392137	-1.29635	0.92182	-0.158462	-0.574817	0.654352	-0.569499	0.866754		Alanine	-1.75028	-0.806316	-0.465561	-0.99844	0.21756	0.24165	1.02749	0.298427	1.51996	0.71551
Lysine	1.27497	0.0553563	-1.3343	1.83998	0.442727	-0.731017	-0.544193	-0.930174	-0.431034	0.357681		Lysine	-1.77198	-0.723294	0.00613622	-0.446744	-0.676218	1.27873	1.05072	0.0172258	1.38768	-0.122253
Serine	-0.993898	2.35337	-1.20251	0.492202	0.039384	-0.531543	-0.223298	-0.373397	0.548075	-0.108383		Serine	-1.50926	-1.19233	0.21908	-0.775704	-0.206317	0.55965	-0.438001	0.785301	1.60732	0.950259
Glutamate	-0.971822	-0.738812	-0.552695	1.00758	-0.405571	-1.57777	0.287344	1.55316	0.875753	0.522837		Glutamate	-0.1011	-0.290393	-0.397899	-1.45114	-1.12592	0.601719	1.64218	-0.121781	-0.251268	1.4956
Histidine	0.644677	2.20935	-0.981382	0.662259	-0.055715	-1.17283	-0.763468	-0.150224	-0.542959	0.150295		Histidine	-0.456394	-0.859321	-0.560084	-1.36819	-0.0973362	1.28213	-0.308028	0.850565	1.81801	-0.301347
Citrulline	NA	NA	NA	NA	NA	NA	NA	NA	NA	NA		Citrulline	-1.48653	-0.479244	-0.240752	-1.4451	0.317396	1.34253	0.0544018	1.11534	-0.269603	1.09157
Betaine	-0.896871	1.21956	-0.99703	-0.854959	-1.2265	0.496746	1.34704	0.416102	0.996817	-0.5009		Betaine	-1.06241	-1.88124	-0.378796	-0.316775	0.341002	0.631779	-0.434655	0.699145	1.12835	1.2736
Homoserine	-0.572119	2.48203	-0.881045	0.502538	0.137685	-0.676076	-0.934275	0.277903	-0.150466	-0.186173		Homoserine	-0.655305	-0.852605	-0.469654	-1.03398	-0.241978	0.608177	-1.07691	0.839473	1.67143	1.21135
Threonine	-0.551273	2.48623	-0.945426	0.476426	0.154663	-0.654663	-0.896402	0.255653	-0.0634539	-0.261754		Threonine	-0.547926	-1.03619	-0.23329	-1.04577	-0.173608	0.469366	-1.0956	0.877597	1.82733	0.958083
Isoleucine/Leucine	-0.247227	2.61455	-1.02291	0.138355	-0.290191	-0.710397	-0.189101	0.319924	-0.554133	-0.0588659		Isoleucine/Leucine	0.0298337	-1.16344	-0.684931	-1.27944	0.1524	-0.205098	-0.306207	0.746357	2.11351	0.597014
Ornithine	-0.0180595	2.49291	-0.670653	0.358113	-1.18603	-0.460021	-0.708386	0.277226	-0.0993754	0.0142793		Ornithine	-0.178914	-0.851933	0.104369	-1.36738	-0.451225	0.500718	-1.28974	1.2827	1.30473	0.94668
Proline	-0.858147	0.795968	0.295229	-0.754876	-0.983787	-0.715701	-1.21013	0.903994	1.17067	1.35678		Proline	-0.190017	-0.798637	-0.00347642	-1.10367	-0.500247	0.436196	-1.43496	1.47127	1.36918	0.754363
Methionine	0.266158	1.97649	1.12529	-0.489084	-0.262989	-1.37603	-0.511869	0.616224	-0.603729	-0.740462		Methionine	0.0575032	-0.105037	-0.364771	-2.07895	0.122313	-0.291949	-0.261282	0.456097	1.97913	0.486955
Phenylalanine	-1.01001	1.84908	-1.87883	-0.201003	0.170745	0.0599828	0.107839	0.868848	-0.291993	0.32534		Phenylalanine	0.740233	-1.29362	-0.791372	-1.5483	1.04471	-0.229494	0.410662	-0.0989802	1.54372	0.222434
Homocysteine	0.447414	2.4311	-0.026639	0.266266	-0.771425	-1.06351	-0.43834	0.382545	-0.607784	-0.619627		Homocysteine	-0.761333	-1.04899	0.332471	-0.580707	0.258243	1.8483	-0.645334	0.398208	1.28162	-1.08248
Glutamine	0.659843	-1.66188	-1.65234	1.59883	0.469896	0.0775675	0.0558659	0.157538	-0.182877	0.477567		Glutamine	-2.66414	0.114146	0.370496	0.612214	0.146792	-0.0160195	1.03227	-0.256467	0.276458	0.384249
Glycine	0.643494	1.75352	0.219928	0.919595	0.32937	-0.0281907	-1.19194	-0.544917	-1.59048	-0.510389		Glycine	-1.64273	-0.318911	-0.0472685	0.969719	1.10522	1.2443	0.639534	-1.3362	-0.0781604	-0.535504
Asparagine	0.066786	2.59974	-0.809012	0.146348	-0.539055	-0.648333	-0.522073	0.426024	-0.621432	-0.0989981		Asparagine	1.52655	0.0918569	-0.712532	-0.15308	-0.219227	-0.985498	-1.00878	0.441767	1.80926	-0.790318
Valine	-0.911238	1.08492	-0.934347	-0.988132	-1.26198	0.49358	1.35403	0.343446	1.12388	-0.30416		Valine	1.47104	0.193888	-0.497192	-0.807539	0.231314	-0.426913	-1.80714	0.906211	1.17603	-0.439708
Aspartic acid	-0.951919	2.07324	-1.6027	0.29097	-0.420948	-0.0440075	0.722945	-0.463603	-0.0731637	0.469194		Aspartic acid	-0.730581	0.118008	0.83424	1.2183	0.0241675	-1.4222	1.32626	-1.36393	-0.563196	0.558929
Tyrosine	-0.918755	2.51513	-0.327174	-0.181413	0.540445	-0.825325	-0.13974	0.38065	-0.583657	-0.46016		Tyrosine	2.41285	0.26971	0.0111103	-0.986025	-0.0537794	-0.475023	-1.22925	0.377093	0.151192	-0.477883
Arginine	0.457149	2.21078	-0.447348	0.255608	0.129529	0.519303	-1.03635	-0.0384306	-1.32035	-0.72989		Arginine	2.29844	-0.051103	0.904111	-0.569065	0.0185745	-0.746724	-1.33437	-0.477367	0.0336513	-0.0761496
Tryptophan	-0.0562564	-0.631935	-1.33642	2.14355	0.149197	-0.833687	0.284233	-0.787507	0.871477	0.197346		Tryptophan	0.575424	0.920613	1.03519	-0.0213266	1.05677	-1.90347	-0.349232	-1.35536	-0.13665	0.178032
Deoxy	-1.51797	0.933743	0.150185	0.678371	-0.86947	-0.26675	0.746449	-1.21711	-0.198268	1.56082		Deoxy	0.101016	-0.841878	-0.642457	-1.13349	-0.620249	1.32046	1.32713	-1.13562	0.60784	1.01725
C0	-0.556098	-0.665024	1.05209	0.0075705	-0.203596	0.136903	0.870119	-1.9	-0.351518	1.60956		C0	-0.516386	-0.0146299	0.316358	0.580918	-2.65704	0.578998	0.137453	0.33652	0.58528	0.652529
C2	-1.58036	0.958355	0.131091	0.270443	-0.85148	0.762043	0.160466	-1.4668	0.214583	1.40166		C2	0.953277	0.608929	0.945092	1.30773	0.546663	-0.0258777	-1.32635	-0.874515	-0.981965	-1.15298
C4	-1.461	-0.425211	0.0525893	-0.658518	0.244513	1.01462	0.465518	-1.49485	1.40377	0.858575		C4	-1.63869	-0.19864	0.0912561	1.33183	0.798743	1.08996	0.723931	-0.674027	-1.27546	-0.248904
C4(iso)	-1.43974	-0.454255	0.110165	-0.675545	0.0374223	1.0445	0.550095	-1.46083	1.37367	0.914511		C4(iso)	-1.48688	-0.276592	0.145022	1.26253	0.886079	1.11139	0.777181	-0.801427	-1.32013	-0.297174
C6	-0.222524	-2.69418	0.206194	0.220951	0.569225	0.543367	0.433715	-0.0967902	0.868546	0.171498		C6	-0.371007	0.217616	0.491339	1.40631	0.465322	0.803961	0.554783	-0.303368	-1.59242	-1.67253
C6-DC	-2.2339	0.759999	0.788495	0.19328	-0.630399	0.410789	0.450759	-0.548387	1.23396	-0.424592		C6-DC	-0.315468	0.790386	0.951395	1.52032	1.13408	-0.694701	-0.428436	-0.713631	-1.322	-0.921946
C8	-1.81505	1.44706	0.546812	0.442305	-0.242357	-0.229258	0.10676	-1.06444	1.28007	-0.471904		C8	-0.0995048	0.815207	1.01357	1.32125	1.06746	-0.369292	-0.400941	-0.612626	-1.3593	-1.37582
C10	-0.493908	1.39628	1.62801	0.238227	-0.842152	-0.330255	-0.191581	-1.51946	0.738953	-0.624106		C10	-1.02524	0.369385	-0.478525	2.24664	0.279756	-1.22283	-0.725037	0.0399052	0.646643	-0.130692
C3	-1.75703	0.0350184	0.568975	-0.649555	-0.250434	1.05896	0.903637	-1.41594	0.639536	0.866834		C3	-0.6736	0.352759	0.308589	0.851872	1.63194	0.369431	-2.05476	-0.724464	0.131016	-0.192778
C3-DC	-0.485379	1.03184	-0.359112	-1.46904	1.71549	0.362717	-0.0865027	-1.36664	0.68006	-0.0234289		C3-DC	0.62937	0.146731	-0.122296	0.352013	1.94324	0.329134	-0.682126	-0.24454	-0.3792	-1.97233
C5	-0.920823	-0.687808	0.197254	-1.14868	-0.285873	0.806114	0.553997	-1.20264	1.67735	1.0111		C5	-1.81494	-0.772751	-0.822624	-0.0279026	0.235114	1.61894	1.21765	0.0140045	-0.147888	0.500396
C5(iso)	-0.927631	-0.666212	0.197922	-1.11585	-0.300018	0.798463	0.557341	-1.2422	1.65733	1.04086		C5(iso)	-1.84336	-0.7491	-0.863558	-0.00119767	0.257048	1.55822	1.22094	0.0110698	-0.131339	0.541278
C5-DC	-1.89627	-0.637221	-0.490921	-0.669359	0.0882365	1.02587	0.484451	-0.270175	0.9147	1.45069		C5-DC	0.844435	-0.261963	1.59726	-0.192892	1.12223	-0.270731	-1.67852	-0.577435	0.407624	-0.990009
Figure 6d	Change in Blood Glucose Levels 30 min after pyruvate injection
	Pre-Gavage					Post-Gavage
Ctrl	81	111	115	61	110	158	165	173	112	175
B2D	55	38	88	58	72	70	72	102	108	77
Figure 6e	AA, Glucose Metabolism, and ISR Gene Expression (Z-Score)
	Ctrl					B2D							Ctrl + FF				B2D + FF
Eno1	-0.352003	-0.708304	0.144864	-0.974642	-0.48665	0.458673	-0.257759	0.49751	2.45686	-0.778554		Eno1	-0.563794	-0.646296	-0.850966	-0.668202	1.10099	0.488062	1.14021	1.63649
Pgam1	-0.326334	0.041116	0.255952	-0.118543	-0.376869	0.678848	-0.0470795	-1.24911	2.30231	-1.16029		Pgam1	-0.469223	-0.54392	-0.835225	-0.787826	1.18112	1.11626	0.338813	1.65955
Casp6	0.481429	-0.047535	0.329683	0.218323	0.539591	-0.529201	-0.339936	-2.13121	1.80884	-0.329987		Casp6	-0.278319	-0.623617	-0.811822	-1.03727	1.33431	0.641436	0.775291	1.51403
Mdh2	-0.27727	-0.386145	0.265438	-0.83206	-0.2992	0.520197	-0.591636	-0.385392	2.60243	-0.616362		Mdh2	-0.434915	-0.729234	-0.939749	-0.702158	1.49083	0.610237	0.704986	1.43863
Nt5e	-0.776402	-1.04107	-1.0167	-0.450522	-0.000691928	-0.212984	0.443526	0.787658	2.28341	-0.0162308		Nt5e	-0.753905	-0.572591	-0.946851	-0.612661	1.49232	0.843568	0.550121	1.34828
Pgk1	-1.34537	1.09225	0.417185	-0.10136	-0.161016	-0.271299	-0.579682	0.131437	1.99407	-1.17622		Pgk1	-0.544352	-0.544531	-0.466599	-0.869386	1.65748	0.443372	0.324018	1.65091
Aldoa	0.186527	-1.33888	-0.214689	0.27683	-0.608392	1.49453	-0.651495	0.338991	1.63185	-1.11527		Aldoa	-0.617508	-0.578184	-0.674922	-0.679236	1.81944	0.19345	0.536966	1.40668
Galk1	0.171784	1.3531	-0.0940843	0.969901	-0.275883	-0.974394	-0.00236958	-1.09921	1.38182	-1.43066		Galk1	-0.796148	-0.533342	-0.120303	-0.857656	1.69693	0.156322	0.454194	1.59332
Aldob	-1.12359	-0.0963865	0.0418255	-0.419372	-0.588306	-0.11859	-0.171075	-0.0816738	2.67231	-0.115142		Aldob	-0.511335	-0.832281	-0.208587	-0.883279	0.545052	0.126678	1.76375	1.43356
Vldlr	-0.675513	-0.949064	-0.916067	-0.946066	0.0130441	0.248769	0.122682	0.286755	2.35272	0.462745		Vldlr	-0.704905	-0.330424	-1.20401	0.0200234	0.387502	0.16467	1.66715	1.50703
Slc37a4	-0.235314	0.212327	1.79088	-0.314533	-0.421634	-0.0473848	-1.02087	-0.808278	1.71875	-0.873942		Slc37a4	-0.569046	-0.829964	-0.308095	-0.756876	1.7023	-0.371069	1.13275	1.06954
Pck1	0.154679	0.357923	1.18565	-0.177429	-1.51769	0.954412	-1.12087	1.29297	-1.12619	-0.00346064		Pck1	-0.747125	-1.11218	-0.549593	-0.22413	0.137707	0.531764	1.96355	0.891423
Rars	-0.40723	0.151953	-0.75445	-1.25453	0.309079	0.264062	-0.977615	2.34119	0.242077	0.0854636		Rars	-0.534641	-0.797505	-1.19186	-0.337642	1.77612	0.999634	0.0858939	0.661063
Ppargc1a	-1.13959	-1.23013	1.2903	-0.632238	-0.939804	-0.194152	1.04871	0.496717	1.36102	-0.0608198		Ppargc1a	-0.983563	-0.559691	-0.605629	0.139554	-0.46187	1.47391	0.997292	1.4939
Got1	-0.543368	-0.827742	0.469043	-0.665976	-1.51655	0.41445	0.708083	-0.380116	2.03584	0.306334		Got1	-0.557222	-1.31125	-0.832502	-0.673562	0.213125	0.520535	1.22073	1.42014
Mthfd1l	-1.32057	-0.962205	0.203786	-0.979408	0.328364	0.232411	-0.839685	1.17791	0.469942	1.68946		Mthfd1l	-0.657122	-1.20161	-1.14645	-0.311762	0.570112	0.16122	1.19519	1.39042
Psat1	-0.52157	0.041649	-0.826422	-0.414756	-0.375039	0.993452	2.35604	0.249192	-0.781052	-0.721497		Psat1	-0.813436	-1.14768	-0.646758	-0.704607	1.64215	1.12223	0.266456	0.28165
Gpt2	-0.201806	-1.13713	-0.0456323	-0.721743	-0.872004	0.433832	0.284628	-0.491168	2.39735	0.353669		Gpt2	-0.628377	-1.03053	-0.871257	-0.760059	0.209085	0.334974	0.999101	1.74707
Pgm1	-1.58478	-0.636288	0.0807408	-0.945113	-0.47413	-0.305915	0.294007	1.07444	1.75201	0.745031		Pgm1	-0.934643	-0.628775	-0.660265	-0.734926	1.53213	1.54632	-0.119847	0.0490775
Gls	-0.677049	-1.06054	-0.0580303	0.165073	-0.77432	-1.31809	1.36294	0.310158	0.31976	1.7301		Gls	-0.323854	-1.09162	-0.538569	-0.552575	2.04316	0.904811	-0.127174	-0.314184
Gapdh	0.313396	-0.630281	0.312579	-0.806369	-0.400053	0.473661	-0.823947	-0.139622	2.46706	-0.766427		Gapdh	-0.481442	-0.476188	-0.439126	-0.419927	-0.351735	-0.226986	2.3954	0.544155
Ier3	0.0577892	0.601152	-1.90679	-1.09431	1.33137	1.2762	0.431726	-0.130413	-0.418845	-0.147875		Ier3	-1.27999	-0.163544	-0.801474	-0.53452	1.12101	1.67592	-0.0173973	-0.624421
P4ha1	-0.757418	-0.759346	0.0554305	-0.230504	-0.166243	0.0857355	-1.22225	2.11256	-0.399434	1.28146		P4ha1	-0.379981	-0.305037	-0.477024	-0.466523	2.40213	-0.511777	-0.261787	0.497656
Asns	-0.987294	0.186996	-0.349482	-0.967066	-0.843788	2.06069	1.02315	-0.105745	0.668153	-0.685613		Asns	0.270339	-1.24063	-0.507095	-0.590786	1.87752	-0.319917	-0.460196	0.970766
Atf3	-0.702279	-0.148317	0.168838	-0.698988	-0.656953	-0.372497	2.48884	-0.330261	0.854611	-0.602998		Atf3	-0.578324	-0.559787	-0.502804	-0.452455	-0.315579	2.33977	-0.364243	0.433417
Atf4	-1.41986	0.944477	0.209704	-0.269711	-0.787121	1.27886	1.54853	-1.1149	-0.235077	-0.154906		Atf4	-1.17009	-0.928214	-0.949136	0.207421	0.346742	1.68766	-0.113185	0.918805
Atf5	-0.669622	-1.45714	-0.444203	-0.923634	-0.523706	1.49395	0.554892	1.02041	1.20674	-0.257685		Atf5	-0.626123	-0.515274	-1.17867	-0.208202	1.00091	-0.791462	0.614834	1.70399
Ddit3	-0.967184	-0.725568	-0.0578687	-0.2289	-0.685224	-0.481569	-0.543404	0.702084	0.619249	2.36838		Ddit3	-0.809402	-0.559356	-0.629562	-0.378991	0.21129	1.692	-0.874779	1.3488
Ddit4	-0.969566	-0.452007	0.155688	-0.926743	-0.604628	0.899592	0.685398	-0.636563	2.19202	-0.343188		Ddit4	-0.555901	-0.925753	-0.323732	-0.810748	1.03103	-0.547839	1.91322	0.219724
Trib3	0.0503934	-1.35241	-1.60208	0.306747	-0.264746	0.986532	0.346026	0.360483	1.70954	-0.540489		Trib3	-0.987254	-0.378331	-1.01981	-0.905972	0.836633	-0.0654672	0.994169	1.52603
Fgf21	-0.984571	0.120997	-1.2079	-0.19379	-0.4869	1.05975	1.35532	1.21741	-1.29245	0.412143		Fgf21	-0.803537	-0.595679	-0.819225	-0.574376	0.0121901	0.502628	0.101928	2.17607
Gdf15	-0.507386	-0.219402	-0.935507	0.444014	-0.555385	1.91778	-0.570016	-0.805883	-0.359492	1.59128		Gdf15	-0.683729	-0.591676	-0.692702	-0.181549	-0.361215	2.31827	-0.174107	0.366708
