# Supplementary figures and images for: Vitamin B2 enables regulation of fasting glucose availability
Source: eLife journal article supplement (doi:10.7554/elife.84077), 2023-06-26

Figure 5d

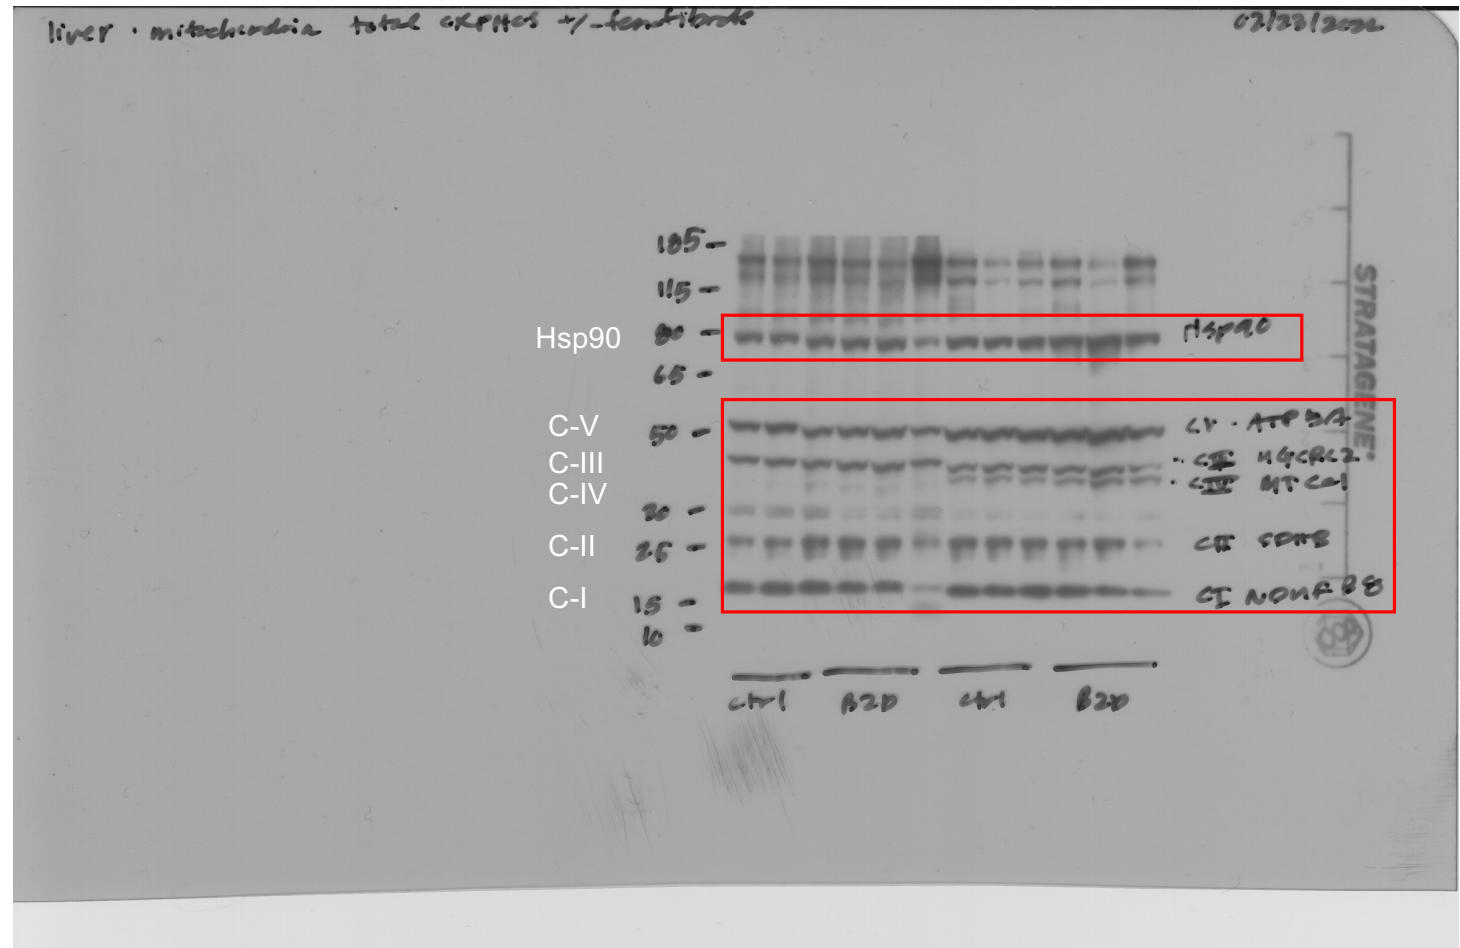

Supplement: fig5-data2 [file elife-84077-fig5-data2-v1.zip]

Figure 6e

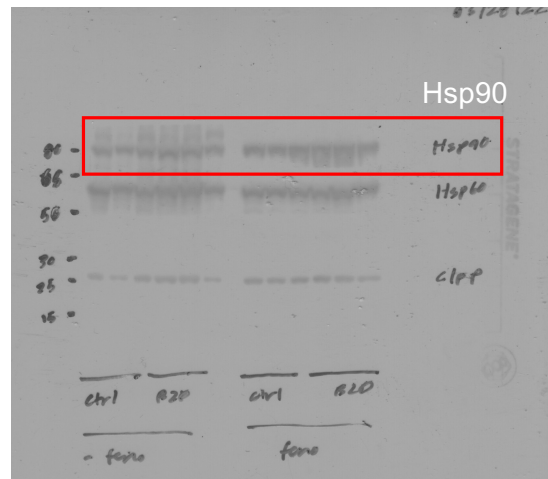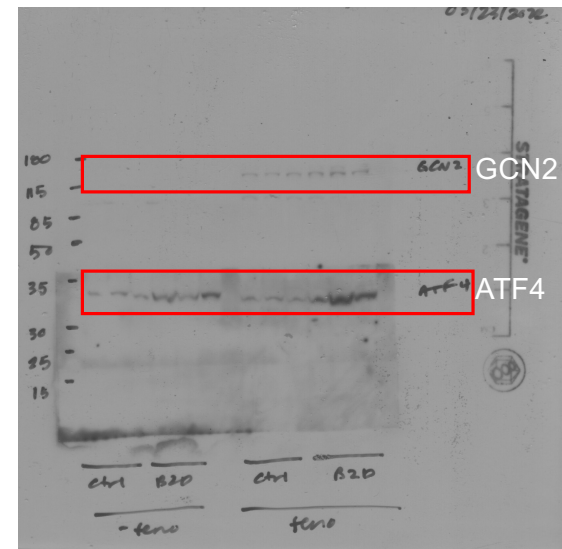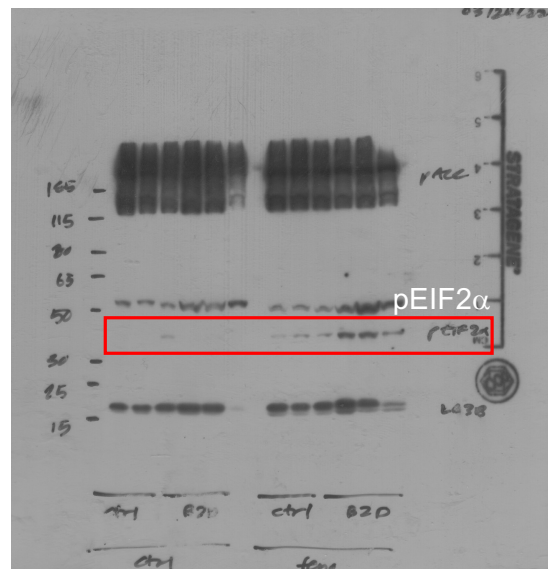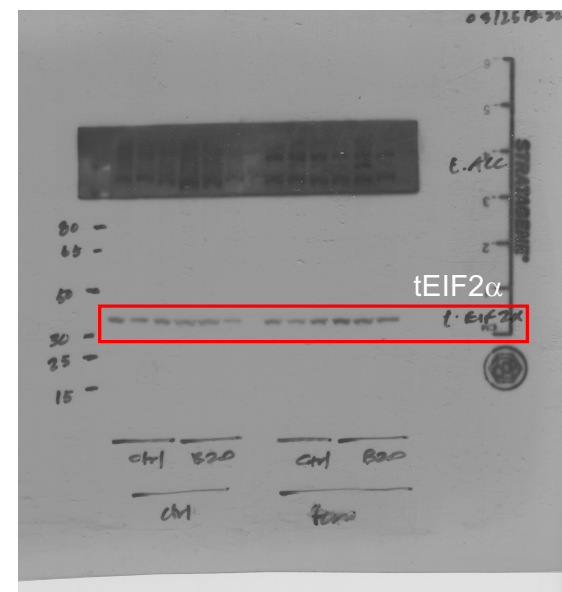

Supplement: fig6-data2 [file elife-84077-fig6-data2-v1.zip]
